# Supplementary material for: Base editing strategies to convert CAG to CAA diminish the disease-causing mutation in Huntington’s disease
Source: eLife. 2024 Jun 13;12:RP89782. doi: 10.7554/eLife.89782 (PMC11175616; doi:10.7554/eLife.89782)
Supplement: Supplementary file 1. — For each gRNA, sequence, length, hybridization site, and PAM sequence are summarized. [file elife-89782-supp1.xls]

## Sheet: gRNA
S. File 1. Sequences, expected hybridization sites, and PAMs of gRNAs used in this study.
For each gRNA, sequence, length, hybridization site, and PAM sequence are summarized.
gRNA #	gRNA sequence	gRNA length	Expecrted hybridization site	PAM sequence
1	GCTGCTGCTGGAAGGACTTG	20	Front-end of the repeaet	NGG on the minus strand
2	CTGCTGCTGCTGCTGCTGGA	20	Front-end of the repeaet	NGG on the minus strand
3	TGCTGCTGCTGCTGCTGCTG	20	Throughout the CAG repeat	NAA or NTG on the minus strand
4	CTGCTGCTGCTGCTGCTGCT	20	Throughout the CAG repeat	NGA or NCT on the minus strand
5	GCTGCTGCTGCTGCTGCTGC	20	Throughout the CAG repeat	NGG or NGC on the minus strand
6	TTGCTGCTGCTGCTGCTGCT	20	Back-end of the repeat	NCT on the minus strand
7	GTTGCTGCTGCTGCTGCTGC	20	Back-end of the repeat	NGC on the minus strand
8	TGTTGCTGCTGCTGCTGCTG	20	Back-end of the repeat	NTG on the minus strand
