# Supplementary material for: Base editing strategies to convert CAG to CAA diminish the disease-causing mutation in Huntington’s disease
Source: eLife. 2024 Jun 13;12:RP89782. doi: 10.7554/eLife.89782 (PMC11175616; doi:10.7554/eLife.89782)
Supplement: Supplementary file 2. — HEK293 cells were treated with different combinations of base editors and guide RNAs (gRNAs). Subsequently, genomic DNA samples were analyzed by MiSeq platform to determine sequence changes produced by BE strategies. Base editor-none and gRNA-none represents HEK293 cells without any treatment (n=8). Empty vector represents HEK293 cells treated with plasmids for a base editor and empty vector for gRNA. Data represent means of three independent experiments. [file elife-89782-supp2.xls]

## Sheet: Conversion type
S. File 2. Types of base conversion by BE strategies.
HEK293 cells were treated with different combinations of base editors and gRNAs. Subsequently, genomic DNA samples were analyzed by MiSeq platform to determine sequence changes produced by base editing strategies. Base editor-none and gRNA-none represents HEK293 cells without any treatment (n=8). Empty vector represents HEK293 cells treated with plasmids for a base editor and empty vector for gRN…
Base editor	gRNA	No conversion	CAG-to-CAA	CAG-to-CAC	CAG-to-CAT	CAG-to-CCG	CAG-to-CGG	CAG-to-CTG	CAG-to-AAG	CAG-to-GAG	CAG-to-TAG
None	None	88.4	8.8	0	0	0	0	0	0	0	2.7
BE4max	Empty vector	91.4	7.2	0	0	0	0	0	0	0	1.4
	gRNA 1	63	35.2	0.6	0.1	0	0	0	0	0	1.1
	gRNA 2	51	47.3	0.3	0.1	0	0	0	0	0	1.4
	gRNA 3	90.2	8.4	0	0	0	0	0	0	0	1.4
	gRNA 4	96	3.8	0	0	0	0	0	0	0	0.2
	gRNA 5	54	45.3	0.4	0.2	0	0	0	0	0	0.3
	gRNA 6	91.6	6.5	0	0	0	0	0	0	0	1.9
	gRNA 7	53.3	45.7	0.5	0.2	0	0	0	0	0	0.5
	gRNA 8	90.7	7.8	0	0	0	0	0	0	0	1.5
BE4-NG	Empty vector	93.1	5.8	0	0	0	0	0	0	0	1.1
	gRNA 1	72.9	25.9	0.1	0	0	0	0	0	0	1.2
	gRNA 2	73.1	26.1	0	0	0	0	0	0	0	0.9
	gRNA 3	75.8	23.2	0	0	0	0	0	0	0	1
	gRNA 4	88.2	10.7	0	0	0	0	0	0	0	1.1
	gRNA 5	74.6	24.6	0	0	0	0	0	0	0	0.7
	gRNA 6	89	10.3	0	0	0	0	0	0	0	0.7
	gRNA 7	76.8	22.7	0	0	0	0	0	0	0	0.5
	gRNA 8	90	8.6	0	0	0	0	0	0	0	1.5
BE4-SpG	Empty vector	91.8	6.6	0	0	0	0	0	0	0	1.6
	gRNA 1	74.9	24.5	0	0	0	0	0	0	0	0.6
	gRNA 2	65	32.8	0	0	0	0	0	0	0	2.1
	gRNA 3	84.4	14.5	0	0	0	0	0	0	0	1.1
	gRNA 4	87.4	11.7	0	0	0	0	0	0	0	0.9
	gRNA 5	77.2	22.1	0	0	0	0	0	0	0	0.7
	gRNA 6	92.2	7.6	0	0	0	0	0	0	0	0.3
	gRNA 7	74.9	23.7	0.1	0	0	0	0	0	0	1.2
	gRNA 8	91.9	6.6	0	0	0	0	0	0	0	1.4
evo-SpG	Empty vector	87.9	8.9	0.1	0	0	0	0	0	0	3.1
	gRNA 1	51.8	47.1	0.1	0	0	0	0	0	0	1.4
	gRNA 2	41.2	58.1	0	0	0	0	0	0	0	0.9
	gRNA 3	71	27.6	0	0	0	0	0	0	0	1.5
	gRNA 4	71.7	26.1	0	0	0	0	0	0	0	2.2
	gRNA 5	84.7	12.7	0	0	0	0	0	0	0	2.6
	gRNA 6	77.6	20.2	0	0	0	0	0	0	0	2.2
	gRNA 7	85	13.4	0	0	0	0	0	0	0	1.7
	gRNA 8	68.6	29.4	0	0	0	0	0	0	0	2
