# Supplementary material for: Base editing strategies to convert CAG to CAA diminish the disease-causing mutation in Huntington’s disease
Source: eLife. 2024 Jun 13;12:RP89782. doi: 10.7554/eLife.89782 (PMC11175616; doi:10.7554/eLife.89782)
Supplement: Supplementary file 3. — HEK293 cells treated with combinations of base editors and guide RNAs (gRNAs) were analyzed by MiSeq. Each sequence read with 16 or 17 CAG repeats were further analyzed to find out sites of conversion. Each data value means the percentage of alleles containing the CAA at a given site relative to all alleles. Base editor-none and gRNA-none represents HEK293 cells without any treatment (n=8). Empty vector represents HEK293 cells treated with a base editor and empty vector for gRNA. Data represent means of three independent experiments. [file elife-89782-supp3.xls]

## Sheet: Conversion site
S. File 3. Sites of CAG-to-CAA conversion in HEK293 cells.
HEK293 cells treated with combinations of base editors and gRNAs were analyzed by MiSeq. Each sequence read with 16 or 17 CAG repeats were further analyzed to find out sites of conversion. Each data value means the percentage of alleles containing the CAA at a given site relative to all alleles. Base editor-none and gRNA-none represents HEK293 cells without any treatment (n=8). Empty vector repre…
Base editor	gRNA	1	2	3	4	5	6	7	8	9	10	11	12	13	14	15	16	17
None	None	0.32	0.48	0.31	0.6	0.54	0.54	0.29	0.3	0.31	0.3	0.36	0.4	0.45	0.49	0.62	1.26	2.04
BE4max	Empty vector	0.37	0.27	0.23	0.2	0.1	0.5	0.2	0.27	0.23	0.23	0.27	0.27	0.3	0.43	0.6	1.3	2
	gRNA 1	6.47	27.33	1.47	1.57	1	2.23	0.17	0.2	0.13	0.13	0.2	0.2	0.27	0.3	0.47	1	1.77
	gRNA 2	0.2	0.4	0.87	42.33	17.3	5.1	2.03	0.3	0.27	0.23	0.27	0.27	0.23	0.37	0.53	1	1.83
	gRNA 3	0.13	0.17	0.23	0.23	0.27	0.67	0.3	0.37	0.43	0.3	0.33	0.57	0.43	0.53	0.9	1.3	1.8
	gRNA 4	0	0	0	0	0.33	0.07	0	0	0.17	0	0.07	0.13	0.13	0.3	0.33	1.17	1.8
	gRNA 5	0.07	0.5	0.1	1.17	6.33	39.23	1.23	0.87	0.27	0.07	0.1	0.3	0.13	0.13	0.37	0.83	1.97
	gRNA 6	0.2	0.2	0.17	0.13	0.3	0.23	0.23	0.27	0.27	0.3	0.3	0.17	0.33	0.37	0.6	1.13	1.87
	gRNA 7	0.07	0.1	0.1	0.47	4.57	40.63	1.23	0.93	0.27	0.2	0.17	0.3	0.1	0.23	0.4	0.73	1.23
	gRNA 8	0.23	0.27	0.27	0.17	0.27	0.27	0.27	0.3	0.3	0.2	0.27	0.33	0.23	0.33	0.63	1.37	3
BE4-NG	Empty vector	0.1	0.13	0.2	0.2	0.27	0.1	0.1	0.23	0.23	0.27	0.23	0.13	0.13	0.47	0.33	1.4	2.03
	gRNA 1	2.8	20.6	0.73	0.6	0.33	0.23	0.17	0.1	0.17	0.17	0.2	0.2	0.2	0.23	0.57	1.27	2.13
	gRNA 2	0.17	0.27	0.27	20.1	10.17	2.77	0.7	0.27	0.17	0.13	0.2	0.2	0.13	0.4	0.43	1	1.93
	gRNA 3	0.17	0.3	0.17	1.2	14.83	1.93	0.57	0.33	0.4	0.4	1.53	1	0.93	1.13	1.37	1.67	1.87
	gRNA 4	0.2	0.3	0.1	0.3	1.33	0.47	0.27	0.33	0.2	0.63	0.67	0.43	0.63	1.2	1.53	1.73	2.23
	gRNA 5	0.1	0.27	0.07	0.37	0.27	7.53	0.2	0.9	3.43	1.17	2.97	6.93	2.37	2.63	5.8	2.97	3.03
	gRNA 6	0.07	0.17	0	0	1.3	0.43	0.23	0.43	0.3	0.6	0.6	0.6	0.53	0.9	1.5	1.43	2
	gRNA 7	0.07	0.1	0.03	0.27	0.23	5.7	0.17	1.1	3.17	1	2.3	6.1	1.37	2	5.07	3.17	6.53
	gRNA 8	0.13	0.17	0.13	0.37	0.83	0.27	0.2	0.2	0.13	0.17	0.2	0.2	0.3	0.43	0.73	1.87	3.5
BE4-SpG	Empty vector	0.23	0.3	0.27	0.17	0.23	0.2	0.17	0.27	0.3	0.27	0.3	0.3	0.27	0.43	0.57	1.13	1.87
	gRNA 1	4.53	20.03	1	0.37	0.1	0.17	0.3	0.07	0.07	0.07	0.1	0.13	0.2	0.37	0.43	1.13	1.57
	gRNA 2	0.37	0.37	0.67	26.07	12.57	2.93	1.13	0.33	0.23	0.3	0.33	0.33	0.33	0.43	0.63	1.23	1.93
	gRNA 3	0.13	0.27	0.17	0.87	7.07	0.43	0.23	0.2	0.27	0.4	0.5	0.53	0.57	1	1.2	1.47	1.83
	gRNA 4	0.1	0.2	0.13	0.3	4.83	1.83	0.3	0.37	0.27	0.27	0.37	0.43	0.4	0.57	0.6	1.1	1.87
	gRNA 5	0.03	0.17	0.1	0.17	0.13	2.1	0.4	2.53	5.73	1.67	2.2	4.53	2.37	2.9	5.57	3.37	1.5
	gRNA 6	0	0.07	0.13	0.43	2.37	0.27	0.07	0.1	0.13	0.17	0.1	0.17	0.07	0.4	0.73	1.4	2
	gRNA 7	0.17	0.2	0.17	0.27	0.17	0.8	0.2	3.3	4.43	1.37	2.7	4.33	1.63	2.87	5.43	4.63	7.6
	gRNA 8	0.13	0.17	0.13	0.2	0.3	0.17	0.17	0.17	0.2	0.17	0.23	0.27	0.27	0.5	0.7	1.4	2.37
evo-SpG	Empty vector	0.4	0.37	0.4	0.37	0.43	0.43	0.33	0.4	0.43	0.37	0.47	0.37	0.43	0.53	0.63	1.23	1.97
	gRNA 1	41.43	42.53	42.4	33.3	20.33	8.9	4.93	3.27	1.77	0.87	0.87	0.27	0.33	0.33	0.4	0.87	1.7
	gRNA 2	2.93	9.93	35.77	54.87	55	53.3	15.1	6.57	2.2	1.17	0.5	0.27	0.3	0.27	0.3	0.63	1.3
	gRNA 3	0.27	0.3	2.73	8.47	21.67	21.77	18.07	6.47	3.1	1.73	2.67	5.03	5.77	5.47	4.2	4.33	4.4
	gRNA 4	0.37	0.47	0.93	6.33	16.4	18.23	17.57	2.93	1.27	0.83	0.93	3.17	5.27	5.6	4.6	4.83	4.97
	gRNA 5	0.37	0.6	0.47	2.37	2.9	4.07	4.37	3.8	4.2	4.03	3.7	3.5	3.97	3.1	2.47	2.47	2.7
	gRNA 6	0.37	0.63	1.13	3.1	11.27	12	10.93	4.57	2.4	1.07	0.73	1.9	2.8	2.7	2.77	3.1	3.5
	gRNA 7	0.37	0.27	0.4	1.8	2.87	4.63	5.3	5.2	5.5	5.2	3.8	4.67	4.57	3.23	2.17	2.77	3.43
	gRNA 8	0.3	0.47	2.43	12.77	23.1	23.13	16.4	5.1	2.3	2.53	4.3	6.5	7.1	6.57	5.2	5.03	4.93
