# Supplementary material for: Base editing strategies to convert CAG to CAA diminish the disease-causing mutation in Huntington’s disease
Source: eLife. 2024 Jun 13;12:RP89782. doi: 10.7554/eLife.89782 (PMC11175616; doi:10.7554/eLife.89782)
Supplement: Supplementary file 4. — HEK293 cells were treated with base editors and guide RNA (gRNA) and subsequently analyzed by MiSeq. Each sequence reads of 16 or 17 repeat alleles were analyzed to count the number of CAG-to-CAA conversion in a given repeat. Each data value means the percentage of alleles containing the given number of conversions relative to all alleles. Base editor-none and gRNA-none represents HEK293 cells without any treatment (n=8). Empty vector represents HEK293 cells treated with plasmid for a base editor and empty vector for gRNA. Data represent means of three independent experiments. [file elife-89782-supp4.xls]

## Sheet: Multiple conversion
S. File 4. The Levels of multiple CAG-to-CAA conversion.
HEK293 cells were treated with base editors and gRNA and subsequently analyzed by MiSeq. Each sequence reads of 16 or 17 repeat alleles were analyzed to count the number of CAG-to-CAA conversion in a given repeat. Each data value means the percentage of alleles containing the given number of conversions relative to all alleles. Base editor-none and gRNA-none represents HEK293 cells without any tr…
Base editor	gRNA	1	2	3	4	5	6	7	8	9	10	11	12	13	14	15
None	None	8.76	0.15	0	0	0	0	0	0	0	0	0	0	0	0	0
BE4max	Empty vector	7.17	0	0	0	0	0	0	0	0	0	0	0	0	0	0
	gRNA 1	26.7	7.8	0.73	0	0	0	0	0	0	0	0	0	0	0	0
	gRNA 2	25.4	18.23	3.33	0.33	0	0	0	0	0	0	0	0	0	0	0
	gRNA 3	8.37	0	0	0	0	0	0	0	0	0	0	0	0	0	0
	gRNA 4	3.8	0	0	0	0	0	0	0	0	0	0	0	0	0	0
	gRNA 5	37.8	7.27	0.27	0	0	0	0	0	0	0	0	0	0	0	0
	gRNA 6	6.53	0	0	0	0	0	0	0	0	0	0	0	0	0	0
	gRNA 7	40.07	5.5	0.17	0	0	0	0	0	0	0	0	0	0	0	0
	gRNA 8	7.7	0.1	0	0	0	0	0	0	0	0	0	0	0	0	0
BE4-NG	Empty vector	5.73	0.07	0	0	0	0	0	0	0	0	0	0	0	0	0
	gRNA 1	21.93	3.73	0.23	0	0	0	0	0	0	0	0	0	0	0	0
	gRNA 2	15.03	9.33	1.6	0.07	0	0	0	0	0	0	0	0	0	0	0
	gRNA 3	17.67	5.13	0.4	0.03	0	0	0	0	0	0	0	0	0	0	0
	gRNA 4	9.73	0.8	0.13	0.07	0	0	0	0	0	0	0	0	0	0	0
	gRNA 5	14.53	5.23	4.2	0.67	0	0	0	0	0	0	0	0	0	0	0
	gRNA 6	10.07	0	0.17	0	0	0	0	0	0	0	0	0	0	0	0
	gRNA 7	13.87	4.73	3.17	0.9	0.03	0	0	0	0	0	0	0	0	0	0
	gRNA 8	8.13	0.43	0	0	0	0	0	0	0	0	0	0	0	0	0
BE4-SpG	Empty vector	6.63	0	0	0	0	0	0	0	0	0	0	0	0	0	0
	gRNA 1	19.23	4.97	0.3	0	0	0	0	0	0	0	0	0	0	0	0
	gRNA 2	18.43	12.13	2.13	0.13	0	0	0	0	0	0	0	0	0	0	0
	gRNA 3	12.37	1.93	0.13	0	0	0	0	0	0	0	0	0	0	0	0
	gRNA 4	10.03	1.53	0.1	0	0	0	0	0	0	0	0	0	0	0	0
	gRNA 5	13.37	5.57	2.2	1	0	0	0	0	0	0	0	0	0	0	0
	gRNA 6	7.47	0.1	0	0	0	0	0	0	0	0	0	0	0	0	0
	gRNA 7	14.7	5.4	2.23	1.03	0.3	0.1	0	0	0	0	0	0	0	0	0
	gRNA 8	6.53	0.07	0	0	0	0	0	0	0	0	0	0	0	0	0
evo-SpG	Empty vector	7.17	0	0	0	0	0	0	0	0	0	0	0	0	0	0
	gRNA 1	26.7	7.8	0.73	0	0	0	0	0	0	0	0	0	0	0	0
	gRNA 2	25.4	18.23	3.33	0.33	0	0	0	0	0	0	0	0	0	0	0
	gRNA 3	8.37	0	0	0	0	0	0	0	0	0	0	0	0	0	0
	gRNA 4	3.8	0	0	0	0	0	0	0	0	0	0	0	0	0	0
	gRNA 5	37.8	7.27	0.27	0	0	0	0	0	0	0	0	0	0	0	0
	gRNA 6	6.53	0	0	0	0	0	0	0	0	0	0	0	0	0	0
	gRNA 7	40.07	5.5	0.17	0	0	0	0	0	0	0	0	0	0	0	0
	gRNA 8	7.7	0.1	0	0	0	0	0	0	0	0	0	0	0	0	0
