# Supplementary material for: Base editing strategies to convert CAG to CAA diminish the disease-causing mutation in Huntington’s disease
Source: eLife. 2024 Jun 13;12:RP89782. doi: 10.7554/eLife.89782 (PMC11175616; doi:10.7554/eLife.89782)
Supplement: Supplementary file 5. — The number of predicted off-targets are summarized. MM represents mismatch. Numbers in parentheses shows predicted off-targets on the protein-coding genes. [file elife-89782-supp5.xls]

## Sheet: Off-target prediction
S. File 5. Off-target prediction.
The number of predicted off targets are summarized. MM represents mismatch. Numbers in parentheses shows predicted off-targets on the protein-coding genes.
	Number of predicted off-targets (protein-coding genes)
	0 MM	1 MM	2 MM	3 MM	4 MM
gRNA 1	1 (1)	0 (0)	1 (1)	10 (1)	66 (2)
gRNA 2	1 (1)	1 (0)	10 (4)	55 (18)	220 (44)
gRNA 3	31 (14)	34 (20)	101 (48)	213 (75)	455 (103)
gRNA 4	34 (14)	44 (23)	59 (29)	134 (48)	330 (73)
gRNA 5	100 (32)	101 (46)	191 (69)	332 (113)	764 (199)
gRNA 6	6 (3)	40 (17)	64 (25)	100 (38)	284 (72)
gRNA 7	6 (4)	126 (37)	156 (59)	285 (94)	569 (160)
gRNA 8	1 (0)	40 (18)	58 (25)	160 (64)	435 (109)
