# Supplementary material for: Base editing strategies to convert CAG to CAA diminish the disease-causing mutation in Huntington’s disease
Source: eLife. 2024 Jun 13;12:RP89782. doi: 10.7554/eLife.89782 (PMC11175616; doi:10.7554/eLife.89782)
Supplement: Supplementary file 6. — HEK293 cells that were treated with base editing (BE) strategies 1 or 2. Subsequently, we performed MiSeq analysis focusing on predicted off-targets on protein-coding genes. Locations of off-targets are based on hg19. MM represents the number of mismatches. MiSeq analysis was performed for HTT as on-target. Numbers represent the percentages of sequence reads containing CAG-to-CAA conversion. [file elife-89782-supp6.xls]

## Sheet: Validation of off-target 
S. File 6. Experimental validation of predicted off-targets.
HEK293 cells that were treated with BE strategies 1 or 2. Subsequently, we performed MiSeq analysis focusing on predicted off-targets on protein coding genes. Locations of off-targets are based on hg19. MM represents the number of mismatches. MiSeq analysis was performed for HTT as on-target. Numbers represent the percentages of sequence reads containing CAG-to-CAA conversion.
gRNA	Chr	Location (hg19)	MM	Gene	BE4max	BE4-nG	BE4-SpG	EvoSpG
1	4	3076591-3076613	0	HTT	27.2	19.1	24.8	40
1	17	4793889-4793911	2	MINK1	0.6	0.1	0.1	0.2
2	4	3076599-3076621	0	HTT	30.5	17.1	23.9	50.9
2	1	20972117-20972139	2	PINK1	0.5	0.1	0.1	2.9
2	8	81599633-81599655	2	ZNF704	0.09	0	0.03	0.43
2	10	104572430-104572452	2	WBP1L	0	0.1	0.1	0.5
2	20	31035535-31035557	2	C20orf112	0	0	0	0.04
