# Supplementary material for: Base editing strategies to convert CAG to CAA diminish the disease-causing mutation in Huntington’s disease
Source: eLife. 2024 Jun 13;12:RP89782. doi: 10.7554/eLife.89782 (PMC11175616; doi:10.7554/eLife.89782)
Supplement: Supplementary file 7. — The names of polyglutamine diseases, respective genes, and RefSeq IDs are shown. [file elife-89782-supp7.xls]

## Sheet: PolyQ disease gene
S. File 7. Other polyglutamine disease genes.
The names of polyglutamine diseases, respective genes, and RefSeq IDs are shown.
Polyglutamine disease	Gene	RefSeq
SCA1 (Spinocerebellar ataxia Type 1)	ATXN1	NM_000332.3
SCA2 (Spinocerebellar ataxia Type 2)	ATXN2	NM_002973.4
SCA3 (Spinocerebellar ataxia Type 3)	ATXN3	NM_004993.6
SCA6 (Spinocerebellar ataxia Type 6)	CACNA1A	NM_001127221.1
SCA7 (Spinocerebellar ataxia Type 7)	ATXN7	NM_000333.3
SCA12 (Spinocerebellar ataxia Type 12)	PPP2R2B	NM_001271900.2
SCA17 (Spinocerebellar ataxia Type 17)	TBP	NM_003194.5
DRPLA (Dentatorubropallidoluysian atrophy)	ATN1	NM_001940.4
SBMA (Spinal and bulbar muscular atrophy)	AR	NM_000044.6
