# Supplementary material for: Base editing strategies to convert CAG to CAA diminish the disease-causing mutation in Huntington’s disease
Source: eLife. 2024 Jun 13;12:RP89782. doi: 10.7554/eLife.89782 (PMC11175616; doi:10.7554/eLife.89782)
Supplement: Supplementary file 8. — Representative HEK293 cell MiSeq data were analyzed to determine the levels of CAG-to-CAA conversion in other polyglutamine disease genes. Each number represents the percentage of sequence reads that contained CAG-to-CAA conversion relative to all sequence reads. [file elife-89782-supp8.xls]

## Sheet: Polyq gene off-target
S. File 8. Off-target conversions in other polyglutamine disease genes.
Representative HEK293 cell MiSeq data were analyzed to determine the levels of CAG-to-CAA conversion in other polyglutamine disease genes. Each number represents the percentage of sequence reads that contained CAG-to-CAA conversion relative to all sequence reads.
Polyglutamine disease gene	Base editor	EV	gRNA 1	gRNA 2	gRNA 3	gRNA 4	gRNA 5	gRNA 6	gRNA 7	gRNA 8
ATXN1	BE4max	1.9	1.4	2.4	4.6	1.9	3.9	2.7	4.5	4
	BE4-NG	2.1	2.4	3.3	3	7.1	20.9	2.3	20	1.3
	BE4-SpG	3.2	1.2	2.7	1.9	2.3	29.5	2.5	24.5	2.6
	evo-SpG	3.7	6.6	6.7	16	12.7	35.8	9.9	22.5	19.1
ATXN2	BE4max	14.1	14.7	13.5	37.5	25.8	45.9	22.6	35.3	25.6
	BE4-NG	15.5	15.4	16.5	48.8	38.2	45.7	24.3	49.1	24.4
	BE4-SpG	15	15.6	15.7	40.1	42.2	41	34.7	40.3	15.4
	evo-SpG	15.3	14.3	35	53	61.1	26.6	57	24.4	54.6
ATXN3	BE4max	1.9	2.3	2.2	2.3	2.3	2	2.5	2.4	2.3
	BE4-NG	2.4	2.4	2.3	2.5	2.9	16	2.5	14.9	2.3
	BE4-SpG	2.4	2.4	2.2	2.5	2.5	13.6	2.5	8.4	2
	evo-SpG	2.4	2.3	2.1	4.6	2.5	25.2	2.7	25.1	4.9
CACNA1A	BE4max	3.4	3.4	2.1	13	3.7	34.4	3.6	23.4	4.1
	BE4-NG	0	0	2	5.7	3.1	17.3	2.1	11.4	2.2
	BE4-SpG	2.8	3	3	5.2	0	15.4	2.2	7.6	2
	evo-SpG	3.1	3.5	3.2	36.1	5	30.4	3.6	28.2	48.3
ATXN7	BE4max	0	0.1	0.3	2.9	7.5	50	3.2	42	0.3
	BE4-NG	0.1	0.1	0.2	22.5	25.1	49	5.2	52.5	1
	BE4-SpG	0.1	0	0.2	20.7	3.8	46.1	2.6	53.7	0.8
	evo-SpG	0	0	5.7	46.2	23.9	39.5	17.6	38.2	73
TBP	BE4max	19.4	19.5	20.4	20	19.8	22.2	19.6	21.1	20.3
	BE4-NG	20.1	20.6	20.4	20.8	19.8	28.3	20.8	29.3	21.5
	BE4-SpG	20.4	20.3	21.3	21.6	21.9	27.2	20.6	28.3	20.5
	evo-SpG	19.2	20	19.2	20	20.5	16.6	21	15.2	20.6
ATN1	BE4max	1.3	1.3	1.5	2.2	1.5	1.6	1.4	1.6	1.2
	BE4-NG	0.8	1.3	1.4	2.8	1.8	34.5	1.6	24.5	1.4
	BE4-SpG	1.3	1.5	1.5	3.5	7.3	37.8	2	34.7	1.4
	evo-SpG	1.4	1.7	1.9	33.8	19.8	43.1	17.6	43.5	36.9
AR	BE4max	1.4	3.6	2.4	17.1	4.4	3.3	0.8	3.3	3.2
	BE4-NG	1.4	3.4	1.9	15.8	9	21.9	4.5	15.8	4.9
	BE4-SpG	1.9	2.4	2.8	5.8	5.6	18.5	5.6	12	3.6
	evo-SpG	0.9	1.5	2	18	3.4	8.3	3.6	6.7	9.7
