# Supplementary material for: Base editing strategies to convert CAG to CAA diminish the disease-causing mutation in Huntington’s disease
Source: eLife. 2024 Jun 13;12:RP89782. doi: 10.7554/eLife.89782 (PMC11175616; doi:10.7554/eLife.89782)
Supplement: Supplementary file 9. — Cells were transfected with plasmids for BE4max and guide RNAs (gRNAs). Subsequently, genomic DNA samples were subjected to MiSeq analysis. Each number represents the percentage of sequence reads containing CAA at specific site relative to all quality control (QC)-passed sequence reads. [file elife-89782-supp9.xls]

## Sheet: Patient-derived cell
S. File 9. CAG-to-CAA conversion in HD patient-derived cells.
Cells were transfected with plasmids for BE4max and gRNAs. Subsequently, genomic DNA samples were subjected to MiSeq analysis. Each number represents the percentage of sequence reads containing CAA at specific site relative to all QC-passed sequence reads.
Cell	CAG	Treatment	Conversion at the 2nd CAG (%)		Conversion at the 4th CAG (%)
			Expanded repeat	Normal repeat	Expanded repeat	Normal repeat
iPSC	42	EV	0.05	0.27	0.06	0
		gRNA 1	1.63	1.95	0.11	0.05
		gRNA 2	0.13	0.12	0.64	0.71
Differentiated neuron	42	EV	0.04	0.08	0.09	0.07
		gRNA 1	2.12	2.2	0.07	0.07
		gRNA 2	0.06	0.12	1.58	2.13
